# Supplementary material
Source: publisher figshare collection journal article supplement (https://acs.figshare.com/ndownloader/files/8593555)
Supplement: Supplementary file 1 [file 8593555]

## *Supporting information*

# **A Post-Synthetic Route for Modifying the Metal—Insulator Transition of VO<sub>2</sub> by Interstitial Dopant Incorporation**

Theodore E. G. Alivio,<sup>a,b†</sup> Diane G. Sellers,<sup>a,b†</sup> Hasti Asayesh-Ardakani,<sup>c,d</sup> Erick J. Braham,<sup>a,b</sup> Gregory A. Horrocks,<sup>a,b</sup> Kate E. Pelcher,<sup>a,b</sup> Ruben Villareal,<sup>b,e</sup> Lucia Zuin,<sup>f</sup> Patrick J. Shamberger,<sup>b</sup> Raymundo Arróyave,<sup>b,e</sup> Reza Shahbazian-Yassar,<sup>c,d</sup> and Sarbajit Banerjee\*<sup>a,b</sup>

<sup>a</sup> Department of Chemistry, Texas A&M University, College Station, Texas 77842-3012, United States

<sup>b</sup> Department of Materials Science and Engineering, Texas A&M University, College Station, Texas, 77843-3003, United States

<sup>c</sup> Department of Mechanical Engineering-Engineering Mechanics, Michigan Technological University, Houghton, Michigan 49933-1295, United States

<sup>d</sup> Department of Mechanical and Industrial Engineering, University of Illinois at Chicago, Chicago, Illinois 60607-7059, United States

<sup>e</sup> Department of Mechanical Engineering, Texas A&M University, College Station, Texas, 77843-3123, United States

<sup>f</sup> Canadian Light Source, University of Saskatchewan, Saskatoon S7N 2V3, Canada

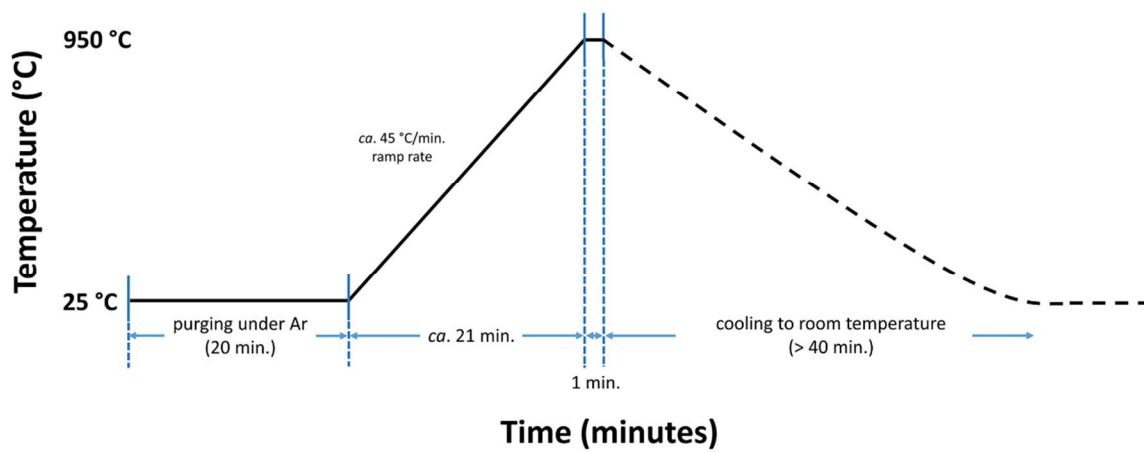

**Figure S1:** Rapid thermal annealing diagram for the diffusive doping process.

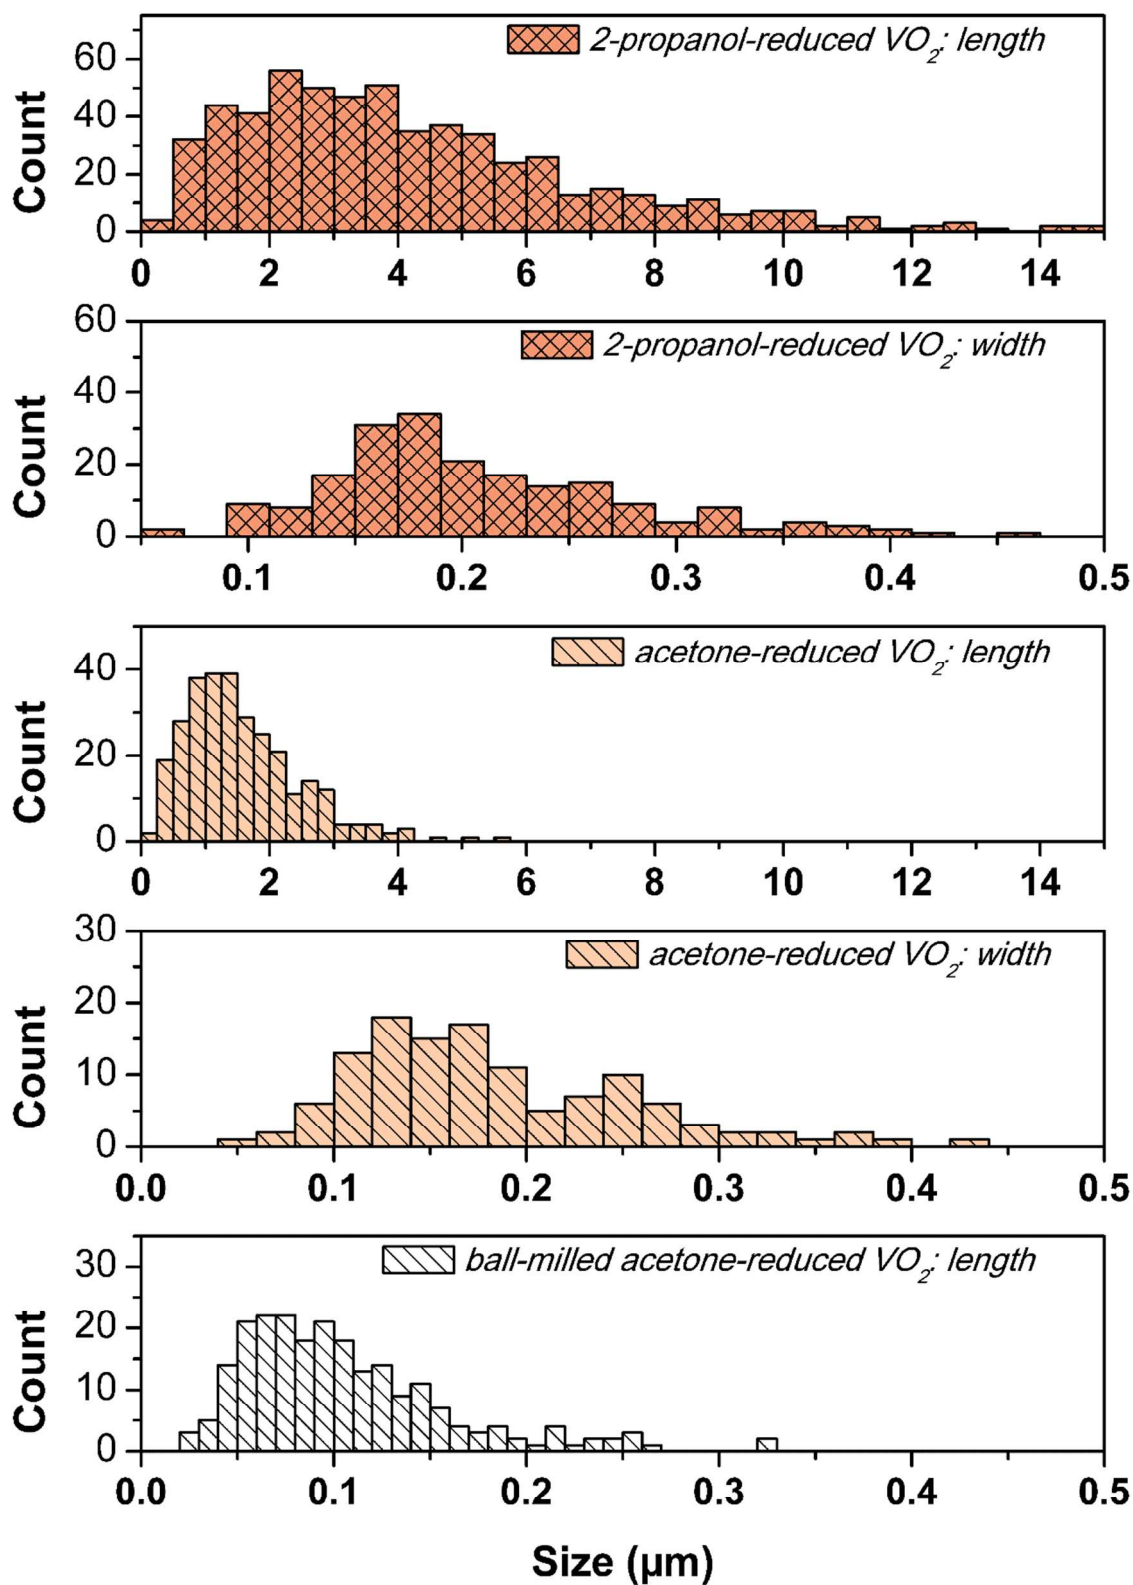

**Figure S2:** Size distribution histograms for  $\text{VO}_2$  samples prepared by 2-propanol-reduction of  $\text{V}_2\text{O}_5$ , reduction of  $\text{V}_2\text{O}_5$  by acetone, and reduction of  $\text{V}_2\text{O}_5$  by acetone followed by ball milling. The dimensions are derived from TEM images.

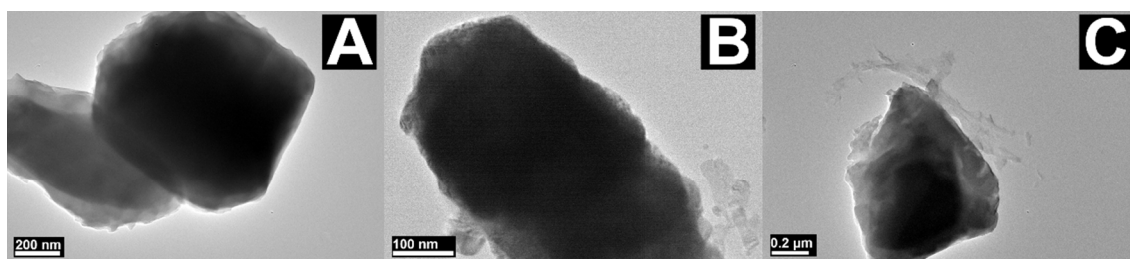

**Figure S3:** TEM images of B-incorporated samples of VO<sub>2</sub> nanowires reduced from A) 2-propanol, B) acetone, and C) acetone, subsequently ball-milled.

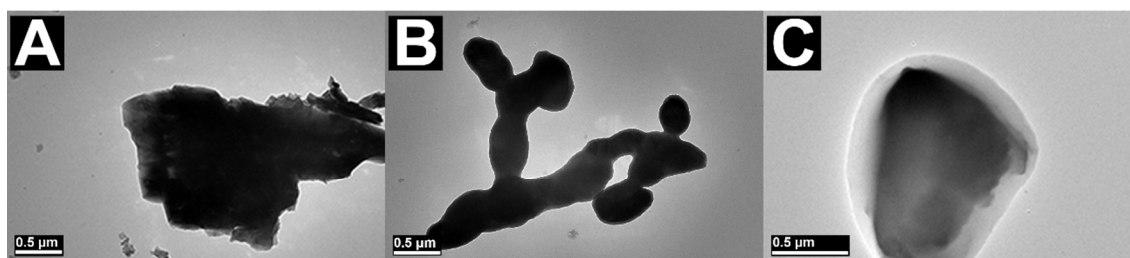

**Figure S4:** TEM images of VO<sub>2</sub> nanowires reduced from A) 2-propanol, B) acetone, and C) acetone, subsequently ball-milled annealed without exposure to the molecular B precursor.

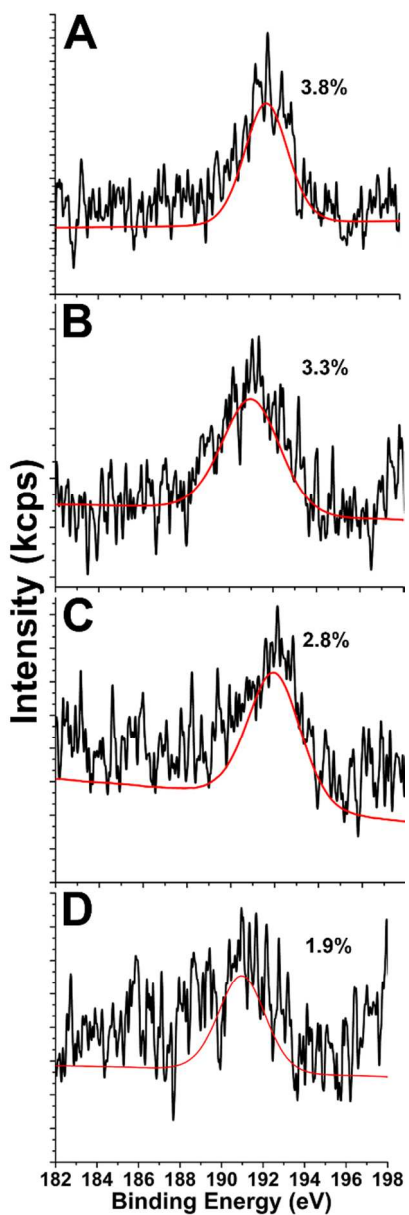

**Figure S5:** High-resolution B 1s XPS spectra of B-incorporated VO<sub>2</sub> samples with increasing B content. All fits (shown in red) are plotted as B-spline functions.

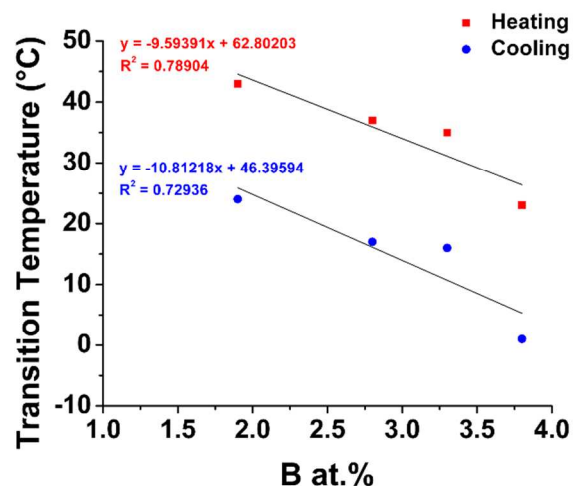

**Figure S6:** Linear relationship between atomic percent of B as deduced from XPS and VO<sub>2</sub> transition temperatures determined from DSC measurements.

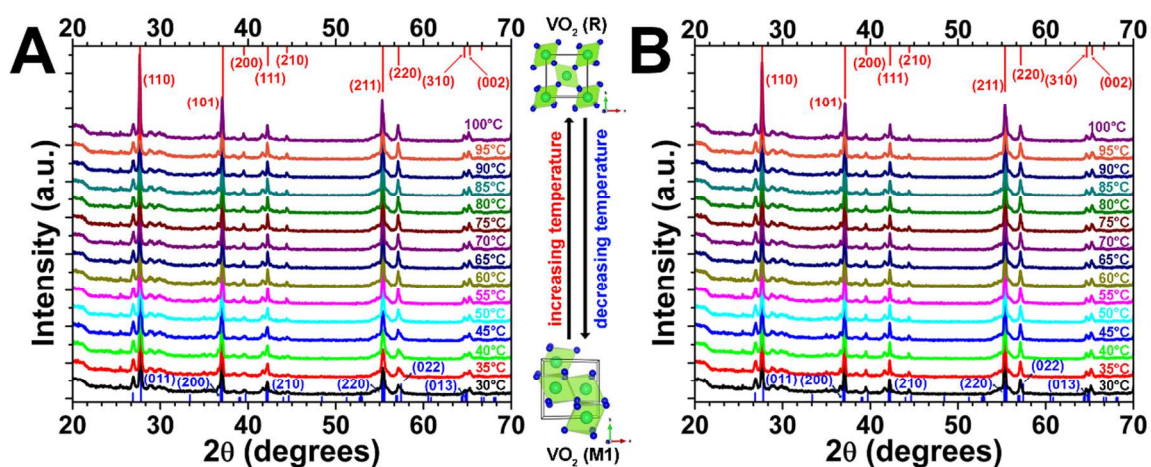

**Figure S7:** XRD patterns corresponding to *in situ* heating (a) and cooling (c) of a B-incorporated VO<sub>2</sub> sample collected at 5°C increments from 30 to 100 °C. Vertical bars indicate positions and relative intensities of reflections derived from JCPDS XRD patterns. Reflections of VO<sub>2</sub>(M<sub>1</sub>) are indicated in blue (JCPDS # 43-1051) and VO<sub>2</sub>(R) in red (JCPDS # 79-1655).

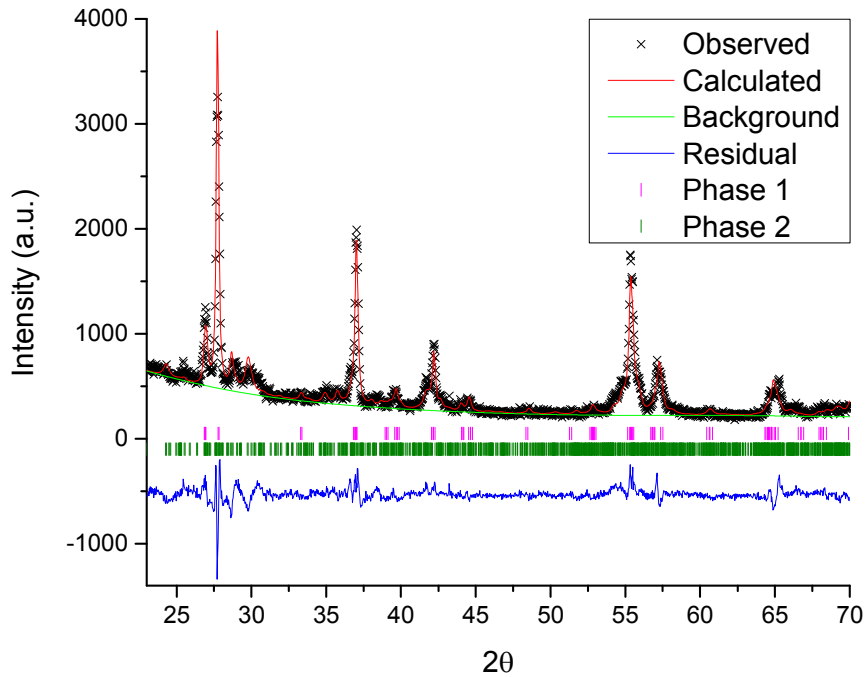

**Figure S8.** Rietveld refinement of powder XRD pattern of 2.8 at.% B-doped VO<sub>2</sub> nanocrystals acquired at 295 K (see Table S1 for details). Pink tick marks indicate the position of reflections corresponding to the P1 21/c 1 monoclinic space group of VO<sub>2</sub> whereas green tick marks indicate the position of reflections corresponding to the P -1 triclinic space group of V<sub>8</sub>O<sub>15</sub>.

**Table S1.** Tabulated parameters from a Rietveld refinement of 2.8 at.% B-doped VO<sub>2</sub> structure. Refinement statistics, including goodness of fit ( $\chi^2$ ), weighted goodness of fit (wRp) and the individual point residuals (Rp) show good agreement between the observed and calculated patterns.

|                                                                                                                                     |                           |                            |
|-------------------------------------------------------------------------------------------------------------------------------------|---------------------------|----------------------------|
| Phase 1: VO <sub>2</sub> (M <sub>1</sub> ) // Space Group: P1 21/c 1 // Wt. Fraction: 0.55810 // Vol: 118.70(3) Å <sup>3</sup>      |                           |                            |
| $\alpha = 90.000(0)^\circ$                                                                                                          | $\beta = 122.31(2)^\circ$ | $\gamma = 90.000(0)^\circ$ |
| $a = 5.7424(8)$                                                                                                                     | $b = 4.539(1)$            | $c = 5.388(2)$             |
| $X^2 = 4.511$                                                                                                                       | wRp = 0.1040              | Rp = 0.0834                |
| Phase 2: V <sub>8</sub> O <sub>15</sub> (triclinic) // Space Group: P -1 // Wt. Fraction: 0.44190 // Vol: 916.095(0) Å <sup>3</sup> |                           |                            |
| $\alpha = 98.90(4)^\circ$                                                                                                           | $\beta = 128.46(3)^\circ$ | $\gamma = 109.12(3)^\circ$ |
| $a = 5.450(3)$                                                                                                                      | $b = 7.011(2)$            | $c = 37.04(1)$             |
| $X^2 = 4.511$                                                                                                                       | wRp = 0.1040              | Rp = 0.0834                |

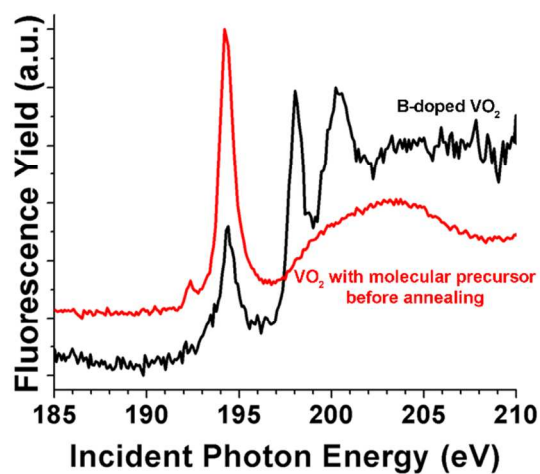

**Figure S9:** B K-edge XANES spectra of an acetone-reduced B-doped VO<sub>2</sub> sample before and after thermal annealing.

**Table S2:** Fractional atomic coordinates of viable interstitial and substitutional sites for B placement within a tetragonal VO<sub>2</sub> assessed using DFT calculations.

| Site      | x        | y        | z        |
|-----------|----------|----------|----------|
| <i>I1</i> | 0.875000 | 0.000000 | 0.500000 |
| <i>I2</i> | 0.250001 | 0.411638 | 0.121699 |
| <i>I3</i> | 0.240321 | 0.875014 | 0.606839 |
| <i>V</i>  | 0.500000 | 0.500000 | 0.250000 |
| <i>O</i>  | 0.500000 | 0.779781 | 0.250000 |
